# Supplementary material
Source: Research Square preprint supplement (doi:10.21203/rs.3.rs-9283012/v1)
Supplement: Supplementary file 1 [file 7a46e9d27dfb4ea9205d0321.docx]

**TRIPOD + AI (TRIPOD-AI) 2024 Reporting Checklist**

*Manuscript: Construction and Validation of a Multimodal Imaging and Machine Learning–Based Prognostic Prediction Model for Aneurysmal Subarachnoid Hemorrhage*

This checklist follows the TRIPOD + AI reporting guideline (Collins GS, Moons KGM, Dhiman P, et al. TRIPOD+AI statement: updated guidance for reporting clinical prediction models that use regression or machine learning methods. BMJ 2024;385:e078378). All items are completed; page numbers refer to the locations in the submitted manuscript.

| **Item** | **Section / Topic** | **Checklist Item / Reporting Description** | **Page** |
| --- | --- | --- | --- |
| **1a** | **Title** | Identified as a study developing and externally validating a multivariable prediction model for aSAH using multimodal imaging and machine learning. Title explicitly states that this is a multicenter retrospective cohort study. | 1 |
| **1b** | **Title** | Target population (adult patients with aSAH), outcome (90-day functional outcome by mRS), and modelling approach (LR, RF, XGBoost) identifiable from title and running header. | 1 |
| **2** | **Abstract** | Structured abstract of 298 words (≤300 word limit) including background, methods, results, and conclusions; reports training/external validation cohort sizes, AUC with 95% CI, calibration, DCA, and SHAP interpretability. | 3 |
| **3a** | **Introduction – Background** | Clinical and scientific background described; limitations of existing clinical scoring systems (AUC 0.70–0.78) identified; rationale for multimodal + ML approach stated. | 5 |
| **3b** | **Introduction – Objectives** | Specific objectives stated: construction and external validation of a multimodal imaging and ML–based prognostic model. Intended clinical use (early risk stratification in aSAH) explicitly stated. | 5 |
| **4a** | **Methods – Source of data** | Retrospective multicenter cohort: two Xinjiang centers for training (n = 335) and one Shanghai center for external validation (n = 212). | 6 |
| **4b** | **Methods – Source of data** | Study dates (January 2020 – June 2024), sites, and data sources specified. | 6 |
| **5a** | **Methods – Participants** | Eligibility criteria and setting specified (inclusion/exclusion criteria with 6 items each). | 6 |
| **5b** | **Methods – Participants** | Details of treatments and standardized multimodal imaging acquisition protocol reported (CTA, DWI, PWI). | 6–7 |
| **5c** | **Methods – Participants** | Flowchart of participant selection reported (Figure 1); 547 of eligible cases retained. | 6, Fig 1 |
| **6a** | **Methods – Outcome** | Primary outcome clearly defined: 90-day modified Rankin Scale (mRS 0–2 = favorable). | 8 |
| **6b** | **Methods – Outcome** | Outcome assessment method specified: validated structured telephone interview (sRmRS); blinded raters; ICC ≥ 0.83; 10% independent re-assessment; loss-to-follow-up 3.2%. | 8 |
| **7a** | **Methods – Predictors** | All candidate predictors defined: 17 clinical variables, 9 CTA morphology, 3 DWI-ADC, 6 PWI, 972 raw radiomic features (972→590→13 after ICC and LASSO). | 7 |
| **7b** | **Methods – Predictors** | Measurement blinding specified; inter-rater ICC assessment in 50-case subset with ICC threshold 0.75. | 7 |
| **8** | **Methods – Sample size** | Consecutive-enrollment sample (n = 547); post-hoc power calculation confirms ≥80% power for ΔAUC ≥ 0.07 at α = 0.05 in both training and external validation cohorts. | 8 |
| **9** | **Methods – Missing data** | Handling of missing data and exclusion criteria reported; cases with incomplete multimodal imaging excluded per inclusion criteria. | 6 |
| **10a** | **Methods – Statistical analysis** | Three algorithms pre-specified: LR with LASSO, RF (n_estimators=500), XGBoost with Bayesian hyperparameter optimization (Optuna). | 7 |
| **10b** | **Methods – Statistical analysis** | Predictor selection and handling of class imbalance: ICC filter → LASSO → class-weight adjustment (not SMOTE). | 7 |
| **10c** | **Methods – Statistical analysis** | Internal validation: nested five-fold stratified cross-validation (outer loop for performance, inner loop for hyperparameter tuning, ≥100 iterations). | 7 |
| **10d** | **Methods – Statistical analysis** | External validation in geographically independent cohort (Shanghai, >3,500 km from training sites). | 7 |
| **10e** | **Methods – Statistical analysis** | Performance measures: AUC with DeLong comparison, accuracy, sensitivity, specificity, PPV, NPV, F1, Brier score, Hosmer–Lemeshow calibration, DCA. | 8 |
| **11a (AI)** | **Methods – AI specifics** | Software and versions reported: scikit-learn 1.3, xgboost 1.7.6, Python 3.8, R 4.3.1, PyRadiomics 3.0, Mimics Research 21.0, NordicICE 2.3.14. | 7 |
| **11b (AI)** | **Methods – AI specifics** | Hyperparameter search strategy (Bayesian optimization via Optuna, ≥100 iterations) and range reported. | 7 |
| **11c (AI)** | **Methods – AI specifics** | Explainability approach specified: SHAP analysis with individual-level interpretation and beeswarm visualization (Figure 5). | 8 |
| **11d (AI)** | **Methods – AI specifics** | Computational reproducibility: fixed random seeds, published code repository (https://github.com/mz19891018/asah-multimodal). | Details pg |
| **12** | **Methods – Ethics and data governance** | IRB approval obtained from all three centers with approval numbers; informed consent waived owing to retrospective design; de-identified data only. | 6 / Details pg |
| **13a** | **Results – Participants** | 547 patients enrolled; 32.2% unfavorable outcomes; baseline characteristics of training and external cohorts reported in Table 1 with between-cohort comparisons. | 9 / Table 1 |
| **13b** | **Results – Participants** | Flow of participants reported in Figure 1. | Fig 1 |
| **14a** | **Results – Model specification** | Final XGBoost model specification reported; 13 LASSO-selected radiomic features identified with ICC range (0.820–0.951, mean 0.887). | 9 |
| **14b** | **Results – Model specification** | Complete table of performance metrics (Table 2); calibration results for all three models reported; sensitivity analysis for treatment-modality imbalance (ΔAUC<0.01). | 9 / Tbl 2 |
| **15** | **Results – Performance** | Apparent, internal, and external performance reported: training AUC 0.903, external AUC 0.876; modest decline (ΔAUC=0.027) indicates acceptable generalization. | 9 |
| **16** | **Results – Model comparison** | Pairwise DeLong comparisons among LR/RF/XGBoost and against clinical-only reference model; all P values reported. | 9 |
| **17** | **Results – Interpretability (AI)** | SHAP beeswarm summary plot (Figure 5) with individual-level and global feature importance; mechanistic interpretation of top predictors discussed. | 9 / Fig 5 |
| **18** | **Discussion – Interpretation** | Principal findings interpreted in clinical context; mechanistic explanation for each top predictor (GCS, ADCmean, GLCM_Entropy, mFS) provided. | 10 |
| **19** | **Discussion – Limitations** | Limitations explicitly enumerated: retrospective design, modest external-cohort size, residual PWI heterogeneity, small ICC subset, telephone mRS misclassification (~25% at mRS 2/3 boundary), ethnic generalizability, prospective validation required. | 11 |
| **20** | **Discussion – Implications** | Clinical implications discussed; explicit positioning as decision-support tool; prerequisites for bedside deployment listed (automated segmentation, web API, prospective validation). | 11 |
| **21** | **Funding** | Funding sources and grant numbers fully disclosed; funder role explicitly reported as nil. | Details pg |
| **22** | **Data & code availability** | De-identified data available on reasonable request; analysis and ML code publicly deposited on GitHub. | Details pg |
| **23** | **AI disclosure** | Full disclosure of AI use: no generative AI for scientific content; limited AI language editing (ChatGPT, GPT-4, 2024) for grammar/style only; no AI-generated references or figures. | Details pg, Meth 2.2 |
| **24** | **Conflicts of interest** | All authors declare no financial or non-financial conflicts of interest. | Details pg |
| **25** | **Registration** | Retrospective study; not registered as a clinical trial (no prospective intervention). Study protocol approved by three IRBs prior to data analysis. | 6 |

*Completed by: Chun Fang (corresponding author), on behalf of all co-authors. Date: April 18, 2026.*
