# Supplementary material
Source: Research Square preprint supplement (doi:10.21203/rs.3.rs-9283012/v1)
Supplement: Supplementary file 2 [file 8159257e1c6aea75f1eaa6a6.docx]

**Table 1. Comparison of baseline characteristics between training and external validation cohorts**

| **Variable** | **Training Cohort**  **(n=335)** | **Validation Cohort**  **(n=212)** | **Statistic** | **P value** | **Missing**  **(%)** |
| --- | --- | --- | --- | --- | --- |
| Age (years, mean±SD) | 56.3±11.8 | 57.8±12.4 | t=1.432 | 0.153 | 0 |
| Female sex, n (%) | 196 (58.5) | 123 (58.0) | χ²=0.018 | 0.892 | 0 |
| GCS score (median, IQR) | 13 (10–14) | 13 (11–15) | Z=−1.208 | 0.227 | 0 |
| Hunt-Hess grade 3–5, n (%) | 103 (30.7) | 62 (29.2) | χ²=0.164 | 0.685 | 0 |
| Modified Fisher 3–4, n (%) | 196 (58.5) | 121 (57.1) | χ²=0.127 | 0.721 | 0 |
| Aneurysm max diameter (mm, mean±SD) | 7.2±3.1 | 7.5±3.4 | t=1.043 | 0.297 | 0 |
| Hypertension, n (%) | 226 (67.5) | 145 (68.4) | χ²=0.061 | 0.804 | 0 |
| Endovascular treatment, n (%) | 192 (57.3) | 134 (63.2) | χ²=2.258 | 0.028* | 0 |
| Serum sodium (mmol/L, mean±SD) | 138.4±4.2 | 136.9±4.8 | t=3.891 | 0.041* | 0 |
| Unfavorable outcome, n (%) | 107 (31.9) | 69 (32.5) | χ²=0.028 | 0.867 | 0 |

**P < 0.05. IQR = interquartile range; SD = standard deviation. Sensitivity analysis: inclusion of treatment modality as a covariate resulted in ΔAUC < 0.01 for XGBoost.*

**Table 2. Discriminative performance of the three ML models in training and external validation cohorts**

| **Model** | **Cohort** | **AUC**  **(95% CI)** | **Accuracy**  **(%)** | **Sensitivity**  **(%)** | **Specificity**  **(%)** | **Brier** | **H-L P** |
| --- | --- | --- | --- | --- | --- | --- | --- |
| **LR** | Training | 0.829 (0.732–0.926) | 79.1 | 76.5 | 80.4 | 0.164 | — |
|  | External | 0.801 (0.735–0.867) | 77.4 | 73.9 | 79.4 | 0.179 | 0.089 |
| **RF** | Training | 0.878 (0.801–0.955) | 83.6 | 82.4 | 84.1 | 0.148 | — |
|  | External | 0.843 (0.786–0.900) | 80.7 | 79.7 | 81.2 | 0.158 | 0.216 |
| **XGBoost (multimodal)** | Training | 0.903 (0.843–0.963) | 86.6 | 85.3 | 87.3 | 0.133 | — |
|  | External | 0.876 (0.826–0.926) | 83.0 | 81.4 | 84.1 | 0.142 | 0.308 |
| **Clinical-only model** | External | 0.805 (0.744–0.866) | 76.9 | 75.4 | 77.8 | 0.177 | 0.174 |

1. *L = Hosmer-Lemeshow test; lower Brier score indicates better calibration; '—' indicates that the statistic is not applicable within the cross-validation training framework*

**Table 3. Systematic comparison of the present model with published aSAH ML prognostic models**

| **Study** | **n** | **Best Model** | **Validation Type** | **Internal AUC** | **External AUC** | **Key Limitation** |
| --- | --- | --- | --- | --- | --- | --- |
| Liu et al., 2023 (Meta-analysis) | SR | Multiple ML | Systematic review | — | 0.780–0.862 | No standardized multimodal integration |
| Senders et al., 2022 | 301 | XGBoost | Internal split | 0.851 | — | Single-center; no external validation |
| Güiza et al., 2021 | 418 | RF | Temporal split | 0.834 | — | ICU data; no radiomics |
| **Present study** | 547 | **XGBoost (multimodal)** | True independent geographically separate external cohort | 0.903 | 0.876 | Retrospective; modest external cohort size |

*Note: Direct numerical comparisons should account for population and definitional heterogeneity. The core methodological advantage of the present study is the truly geographically independent external validation design. SR = systematic review.*
